# Supplementary material for: Enhancing the performance of a cylindrical nanopore in osmotic power generation through designing the waveform of its inner surface
Source: Royal Society of Chemistry journal article supplement (doi:10.1039/d3cp03637e), 2023-01-01
Supplement: d3cp03637e8.pdf [file d3cp03637e8.pdf]

1  
2  
3  
4  
5  
6  
7  
8  
9  
10  
11  
12  
13  
14  
15  
16  
17  
18  
19  
20  
21

## Supporting Information

### Enhancing the performance of a cylindrical nanopore in osmotic power generation through designing the waveform of its inner surface

Chung-Wei Liu\* and Jyh-Ping Hsu

Department of Chemical Engineering, National Taiwan University, Taipei 10617, Taiwan

Tel: 886-2-33663055; e-mail: [genius870930@gmail.com](mailto:genius870930@gmail.com)

#### 1. The frequency and amplitude of the waveform assumed for the nanopore wall

**Table S1** The frequency  $f$ , wavelength  $\lambda$ , and width  $W$  assumed for the waveform of the nanopore wall.

| $f$<br>[nm <sup>-1</sup> ] | $\lambda$<br>[nm] | $W$<br>[nm] |
|----------------------------|-------------------|-------------|
| 0.5                        | $4\pi$            | $2\pi$      |
| 1                          | $2\pi$            | $1\pi$      |
| 2                          | $1\pi$            | $(1/2)\pi$  |
| 4                          | $(1/2)\pi$        | $(1/4)\pi$  |
| 8                          | $(1/4)\pi$        | $(1/8)\pi$  |
| 16                         | $(1/8)\pi$        | $(1/16)\pi$ |

**Table S2** The amplitude  $a$  and height  $H$  of the waveform assumed for the nanopore wall.

| $a$<br>[nm] | $H$<br>[nm] |
|-------------|-------------|
| 1/4         | 1/2         |
| 1/2         | 1           |
| 1           | 2           |
| 2           | 4           |
| 4           | 8           |
| 8           | 16          |

1 **2. Physical parameters and schematic diagram with boundary conditions**

2 **Table S3** Values of physical parameter

| Name                               | Symbol       | Value                                    |
|------------------------------------|--------------|------------------------------------------|
| Radius of computational domain     | $R_R$        | 1000 nm                                  |
| Length of computational domain     | $L_R$        | 1000 nm                                  |
| Radius of nanopore                 | $R_N$        | 20 nm                                    |
| Length of nanopore                 | $L_N$        | 600 nm                                   |
| Gas constant                       | $R$          | 8.314 J/(mol · K)                        |
| Faraday constant                   | $F$          | 96485 C/mol                              |
| Valence of Na <sup>+</sup>         | $z_1$        | 1                                        |
| Valence of Cl <sup>-</sup>         | $z_2$        | -1                                       |
| Diffusivity of Na <sup>+</sup>     | $D_1$        | $1.33 \times 10^{-9}$ m <sup>2</sup> /s  |
| Diffusivity of Cl <sup>-</sup>     | $D_2$        | $2.03 \times 10^{-9}$ m <sup>2</sup> /s  |
| Diffusivity of Mg <sup>2+</sup>    | $D_3$        | $7.10 \times 10^{-10}$ m <sup>2</sup> /s |
| Diffusivity of La <sup>3+</sup>    | $D_4$        | $6.00 \times 10^{-10}$ m <sup>2</sup> /s |
| Vacuum permittivity                | $\epsilon_0$ | $8.85 \times 10^{-12}$ F/m               |
| Permittivity of NaCl solution      | $\epsilon$   | $6.95 \times 10^{-10}$ F/m               |
| Viscosity of NaCl solution         | $\mu$        | 0.001 Pa · s                             |
| Density of NaCl solution           | $\rho$       | 998 kg/m <sup>3</sup>                    |
| Surface charge density of nanopore | $\sigma$     | -0.01 C/m <sup>2</sup>                   |
| Salt concentration (high)          | $C_H$        | 10, 50, 100 mM                           |
| Salt Concentration (low)           | $C_L$        | 1 mM                                     |

3

4

**Table S4** Boundary conditions assumed in numerical modeling

| Scheme | Surface       | Navier<br>-Stokes                                       | Nernst<br>-Planck | Poisson                                            |
|--------|---------------|---------------------------------------------------------|-------------------|----------------------------------------------------|
|        | AB            | $p = 0$<br>$n \cdot [\mu(\nabla u + (\nabla u)^T)] = 0$ | $C_i = C_L$       | $\phi = 0$                                         |
|        | BC, FG        | slip                                                    | $n \cdot J_i = 0$ | uncharged<br>$-n \cdot (\epsilon \nabla \phi) = 0$ |
|        | CD, DE,<br>EF | no slip                                                 | $n \cdot J_i = 0$ | $-n \cdot (\epsilon \nabla \phi) = \sigma$         |
|        | HG            | $p = 0$<br>$n \cdot [\mu(\nabla u + (\nabla u)^T)] = 0$ | $C_i = C_H$       | $\phi = 0$                                         |
|        | AH            | Axial symmetry                                          | Axial<br>symmetry | Axial symmetry                                     |

5

1 **3. Code verificaiton**

2

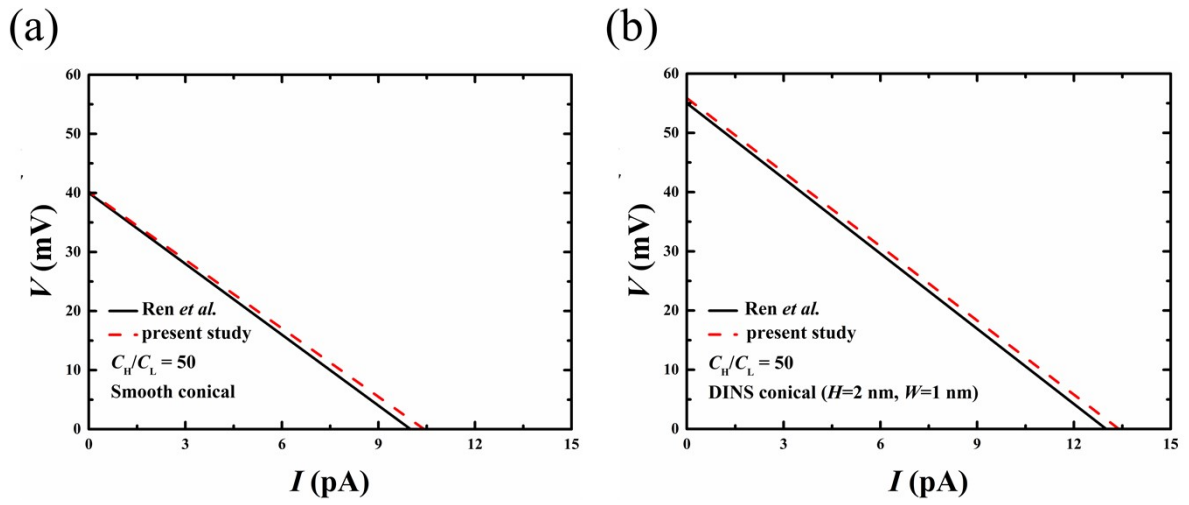

3

4 **Fig. S1.** Current-voltage ( $I$ - $V$ ) curve for a smooth conical nanopore, (a), and a conical  
5 nanopore with designed interfacial nanostructures (DINS), (b), at  $L_N = 600$  nm,  $R_{tip} = 6$  nm,  
6  $R_{base} = 40$  nm,  $C_H = 50$  mM,  $C_L = 1$  mM, and  $T = 303$  K. Solid line: simulated results of Ren *et al.*  
7 [S1]; dotted line: present results.

8

9

10

11

12

13

14

15

16

17

18

19

20

21

22

23

24

25

26

27

28

1 **4. Choice of computation domain and mesh size**

2

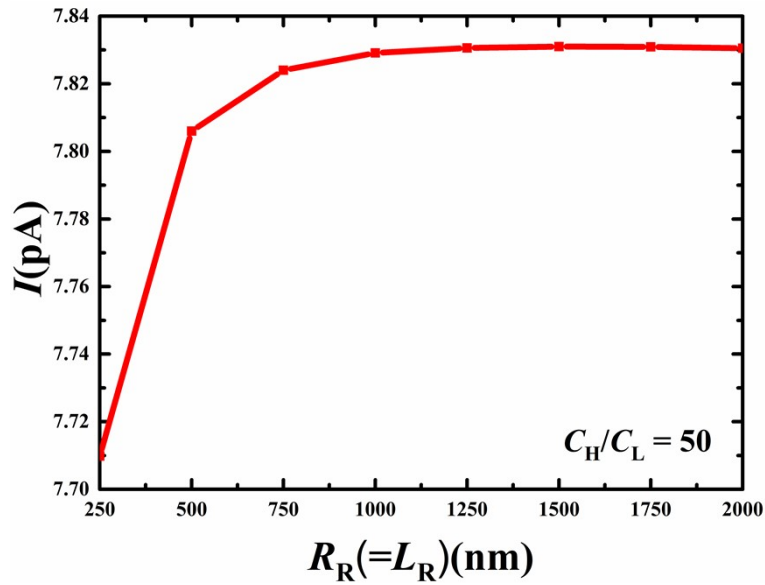

3

4 **Fig. S2.** Variation of ionic current with the size of computation domain ( $R_R=L_R$ ) for the  
5 case of square waveform at  $f = 0.5 \text{ nm}^{-1}$ ,  $a = 0.5 \text{ nm}$ , and  $(C_H/C_L) = 50$ .

6

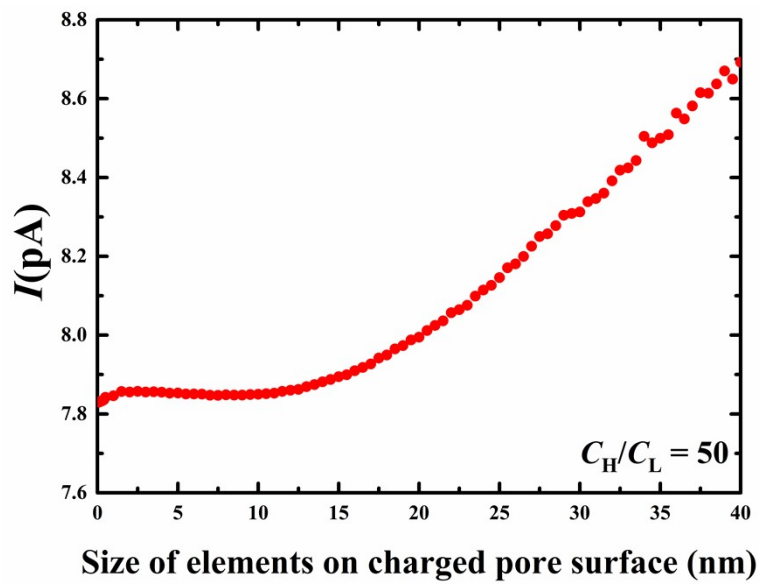

7

8 **Fig. S3.** Variation of ionic current with size of element on nanopore surface at  $f = 0.5 \text{ nm}^{-1}$ ,  
9  $a = 0.5 \text{ nm}$ , and  $(C_H/C_L) = 50$

10

11

12

13

1 **5. Effective bulk concentration range**

2

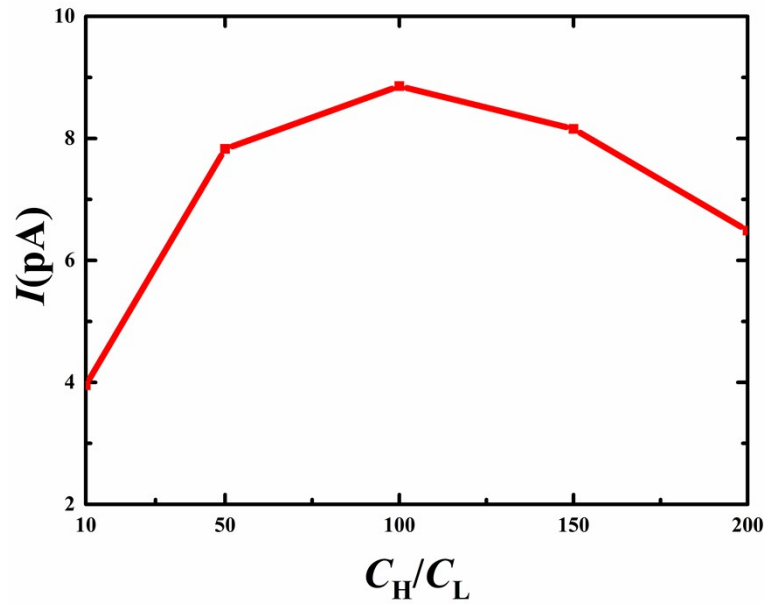

3

4 **Fig. S4.** Variation of ionic current with bulk concentration ratio ( $C_H/C_L$ ) at  $f = 0.5 \text{ nm}^{-1}$  and

5  $a = 0.5 \text{ nm}$

6

7

8

9

10

11

12

13

14

15

16

17

18

19

20

21

22

23

24

25

1 **6. Influence of frequency and amplitude of the waveform on the  $I_+$  and  $I_-$**

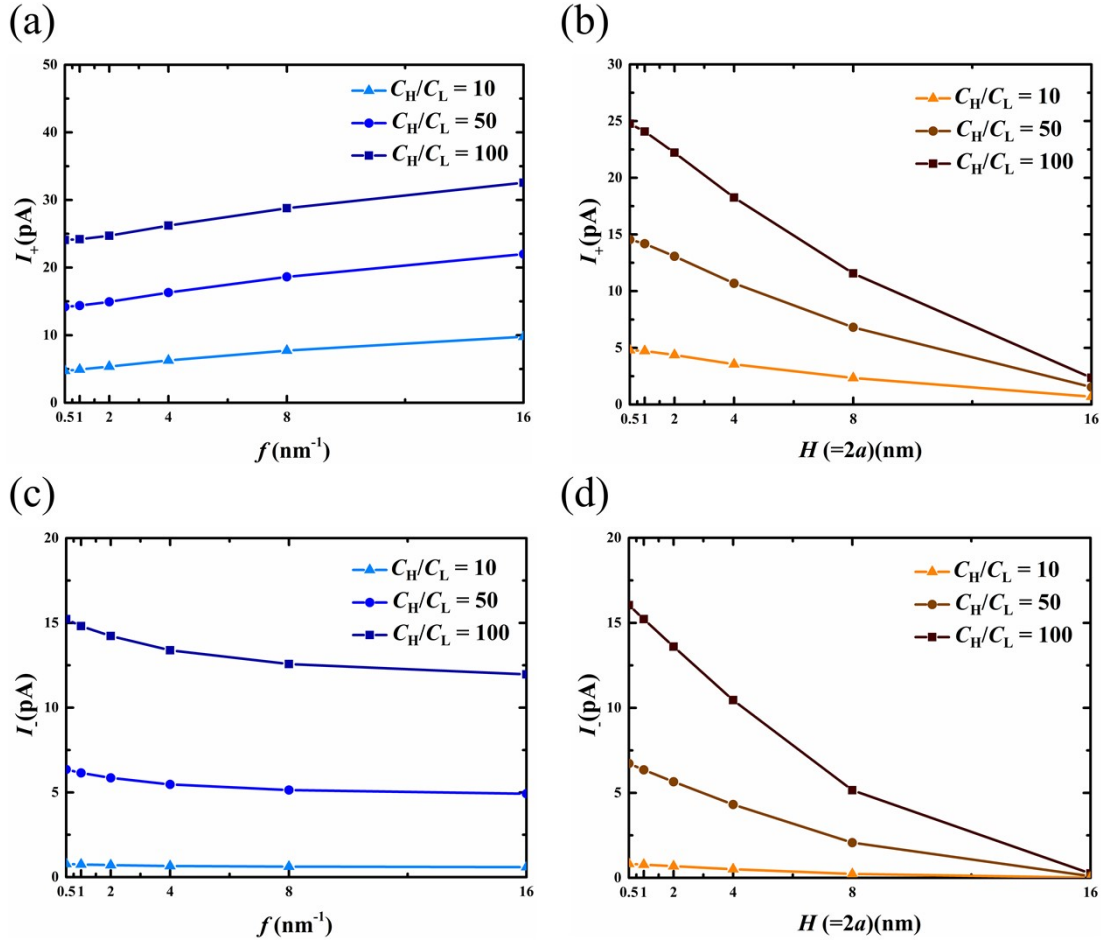

2

3 **Fig. S5.** Variation of  $I_+$  with  $f$ , (a), and  $H(=2a)$ , (b), for various levels of bulk  
4 concentration ratio ( $C_H/C_L$ ), (c) and (d) are the corresponding variation of  $I_-$ . (a) and (c):  
5  $a = 0.5 \text{ nm}$ ; (b) and (d):  $f = 0.5 \text{ nm}^{-1}$ .

6

7

8

9

10

11

12

13

14

15

16

17

1 7. Influence of  $f$  and  $a$  on ionic flux

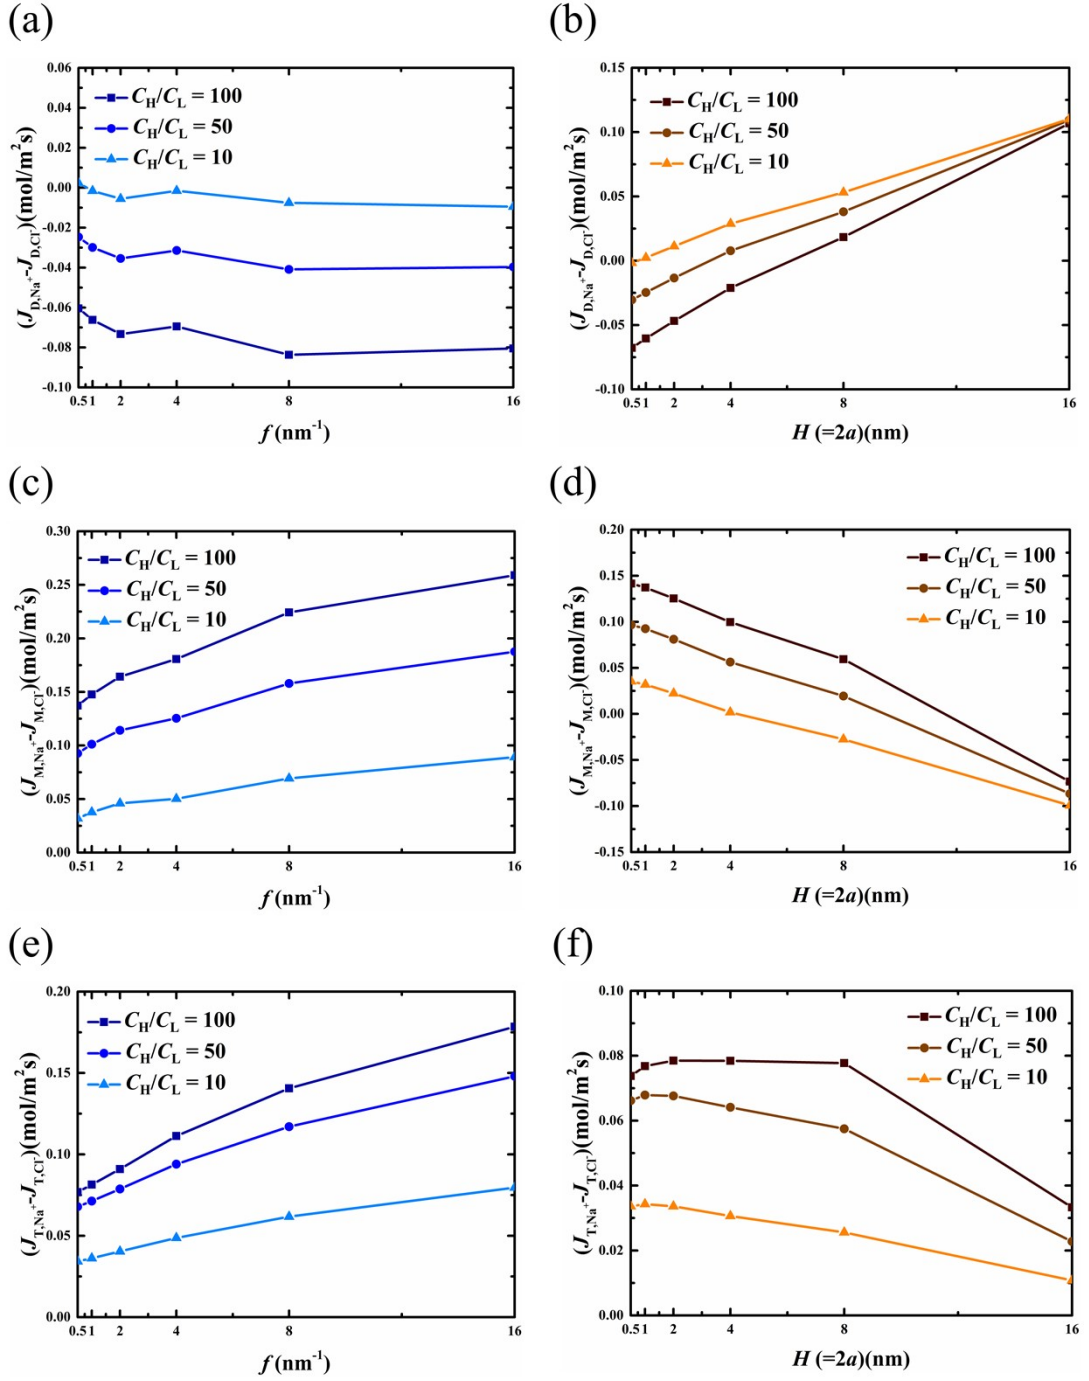

2

3 **Fig. S6.** Variation of  $(J_{D,Na^+} - J_{D,Cl^-})$  with  $f$ , (a), and  $H (=2a)$ , (b), for various levels of  
 4 bulk concentration ratio ( $C_H/C_L$ ), (c) and (d) are the corresponding variation of  
 5  $(J_{D,Na^+} - J_{D,Cl^-})$ , (e) and (f) are the corresponding variation of  $(J_{T,Na^+} - J_{T,Cl^-})$ . (a), (c),  
 6 and (e):  $a = 0.5$  nm; (b), (d), and (f):  $f = 0.5$  nm<sup>-1</sup>.

1

2

### 3 8. Influence of various electrolytes

4

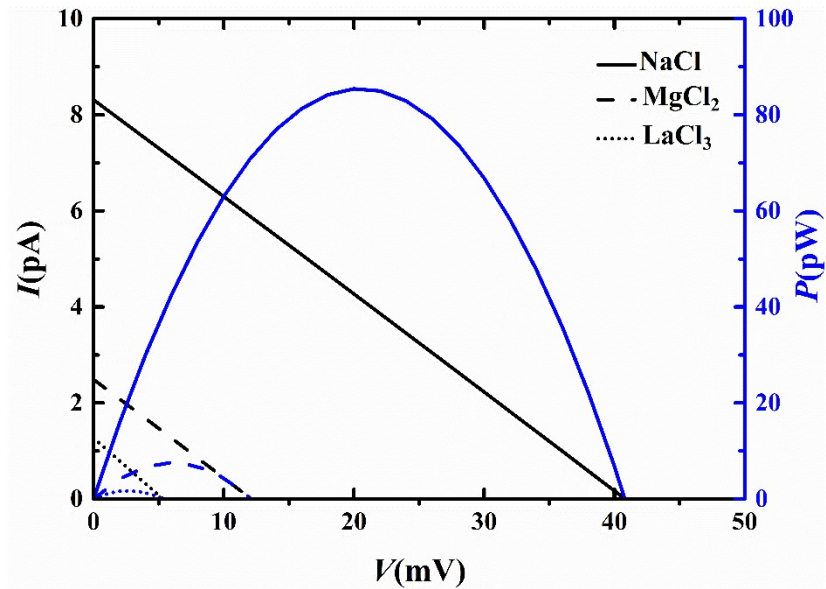

5

6 **Fig. S7** Current-voltage ( $I$ - $V$ ) curve and power-voltage ( $P$ - $V$ ) curve for various electrolytes in  
7 the case of a square waveform at  $f = 2 \text{ nm}^{-1}$ ,  $a = 0.5 \text{ nm}$ , and  $(C_{H, Cl^-} / C_{L, Cl^-}) = 10$

8

9

### 10 References

11 1 Q. Ren, Q. Cui, K. Chen, J. Xie and P. Wang, *Desalination*, 2022, **535**, 115802.

12

13

14

15
