# Supplementary figures and images for: Enhancing the performance of a cylindrical nanopore in osmotic power generation through designing the waveform of its inner surface
Source: Royal Society of Chemistry journal article supplement (doi:10.1039/d3cp03637e), 2023-01-01

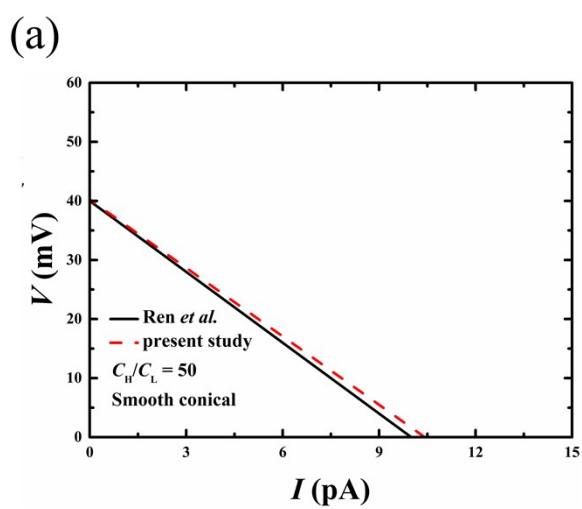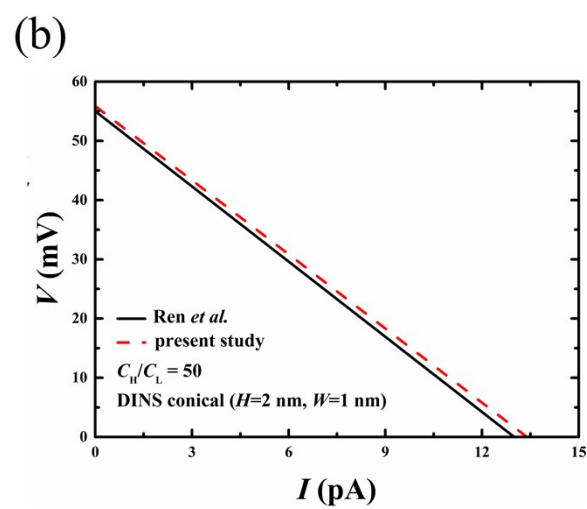

Supplement: d3cp03637e1.pdf [file d3cp03637e1.pdf]

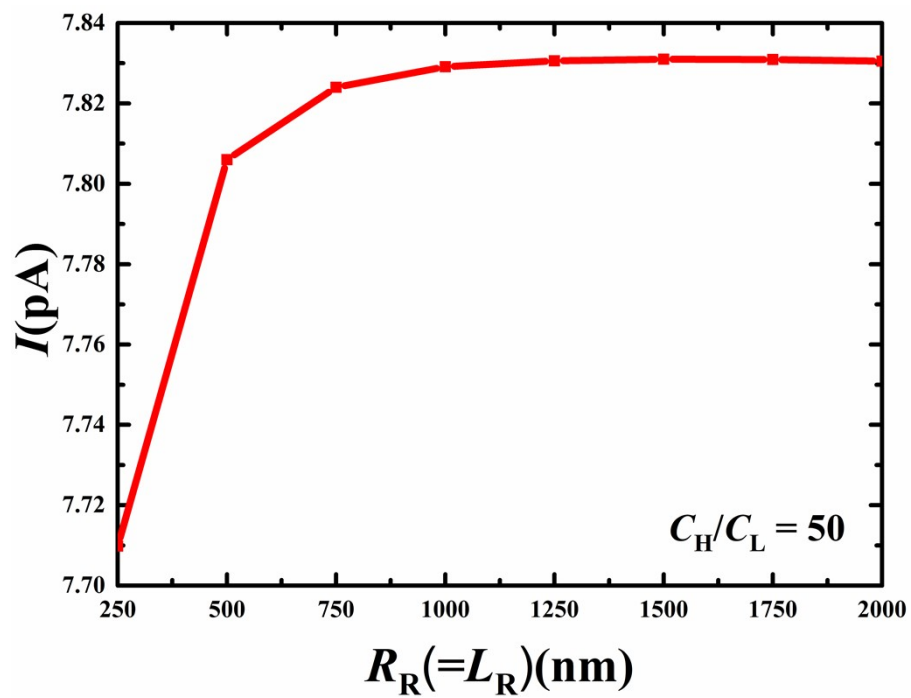

Supplement: d3cp03637e2.pdf [file d3cp03637e2.pdf]

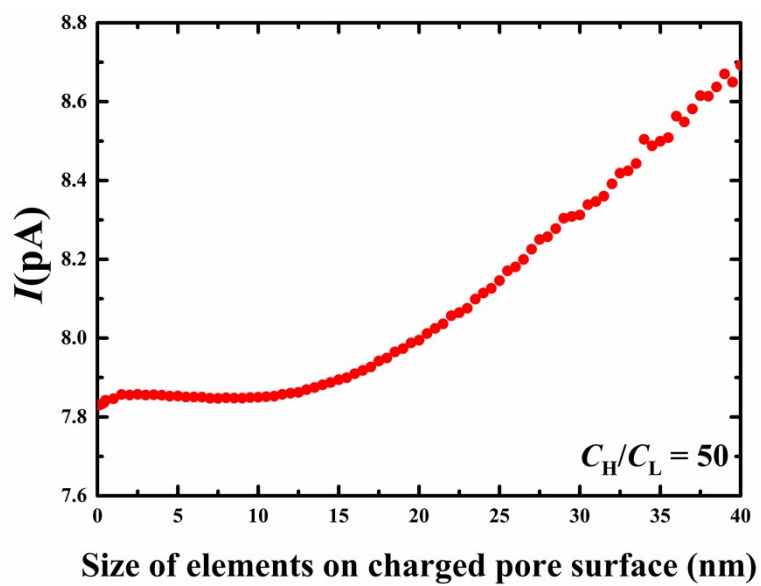

Supplement: d3cp03637e3.pdf [file d3cp03637e3.pdf]

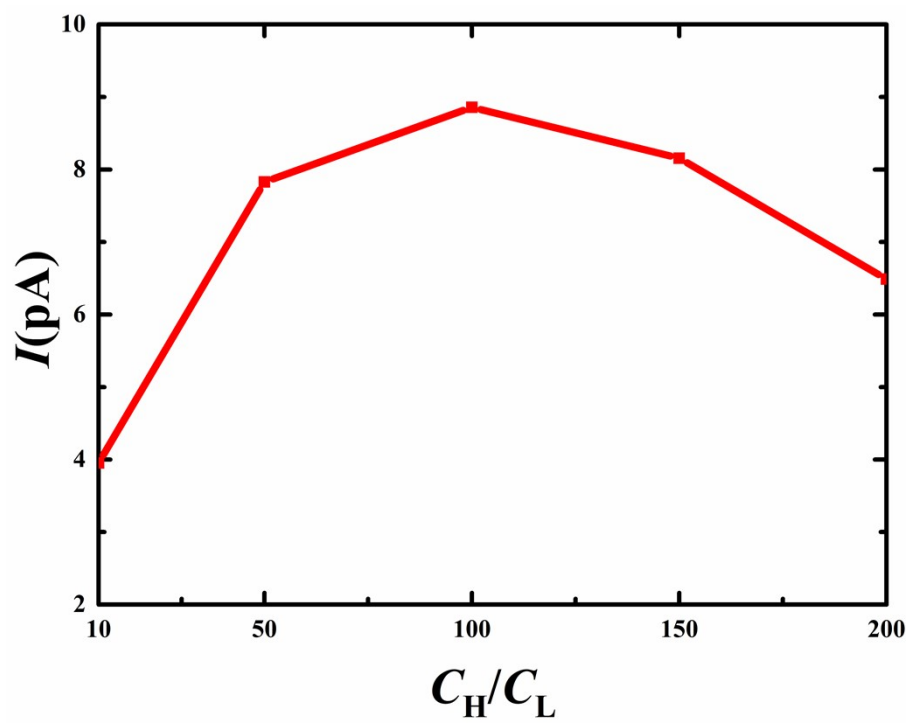

Supplement: d3cp03637e4.pdf [file d3cp03637e4.pdf]

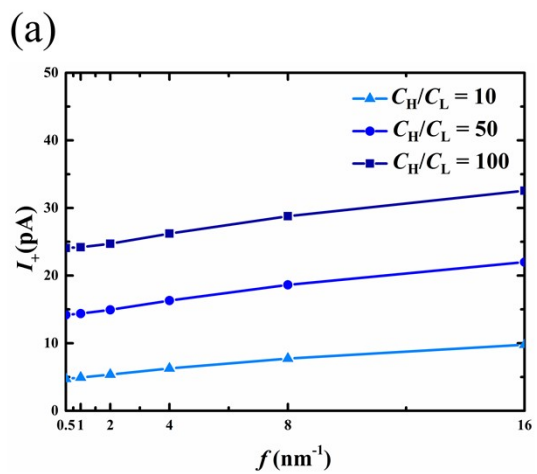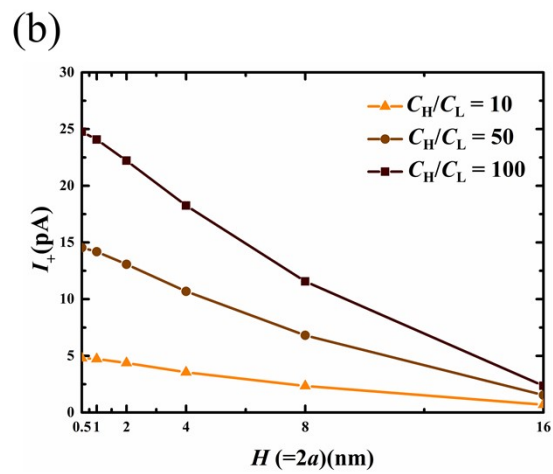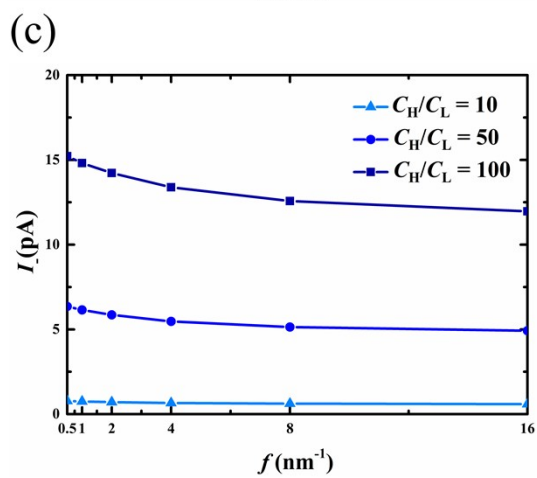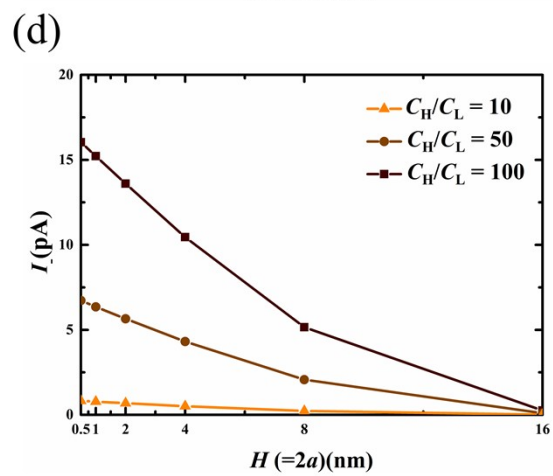

Supplement: d3cp03637e5.pdf [file d3cp03637e5.pdf]

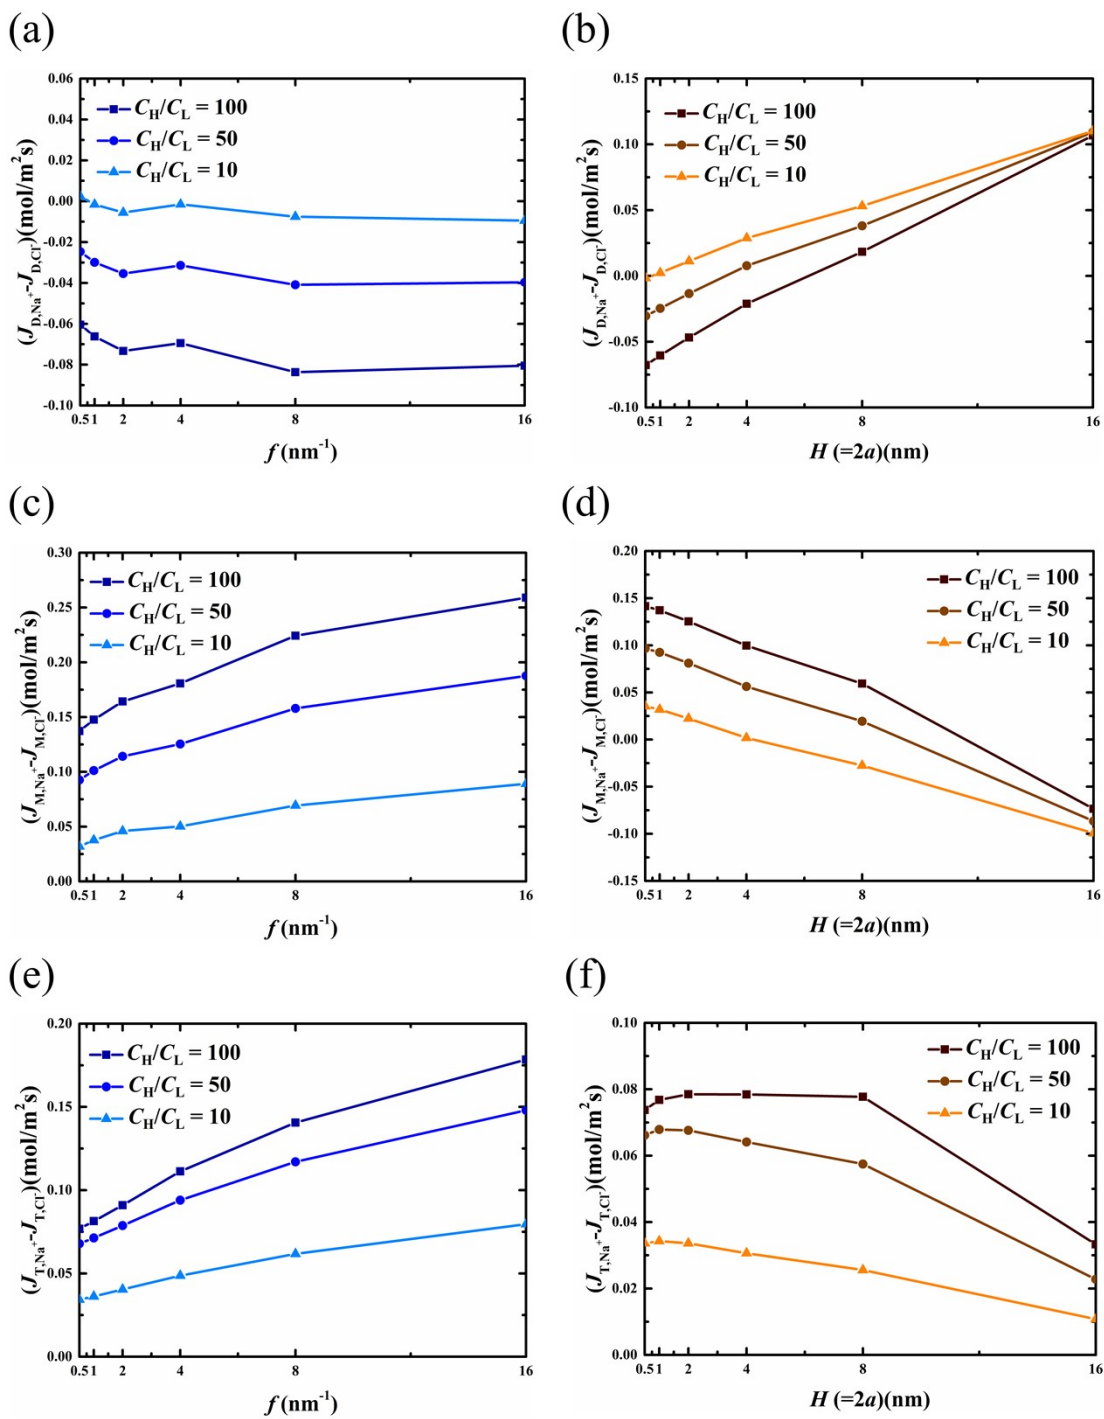

Supplement: d3cp03637e6.pdf [file d3cp03637e6.pdf]

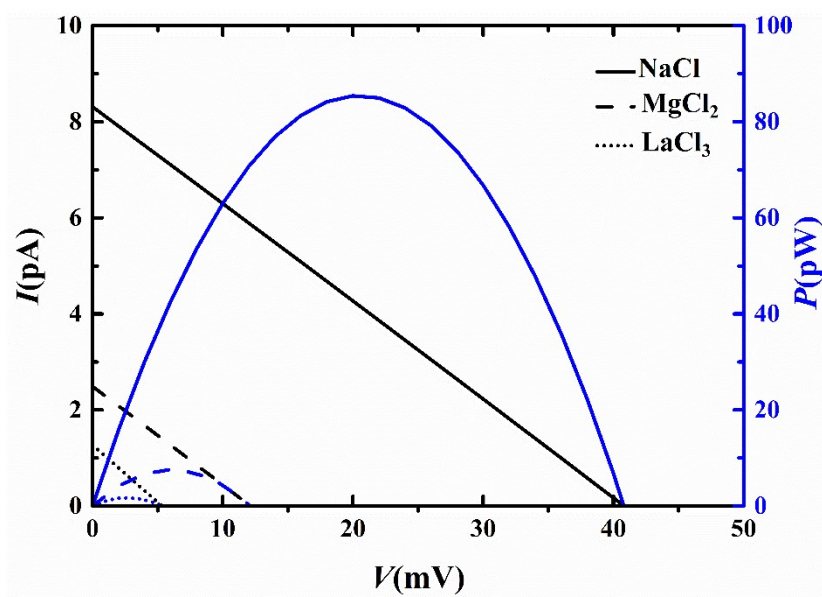

Supplement: d3cp03637e7.pdf [file d3cp03637e7.pdf]
